# Supplementary material for: Facile solution combustion synthesis of monoclinic VO2: a unique and versatile approach
Source: Royal Society of Chemistry journal article supplement (doi:10.1039/c3ta11692a), 2013-01-01
Supplement: c3ta11692a.pdf [file c3ta11692a.pdf]

## Supporting Information

### SI 1. PXRD pattern of as synthesized blue black VO<sub>2</sub> without passing air.

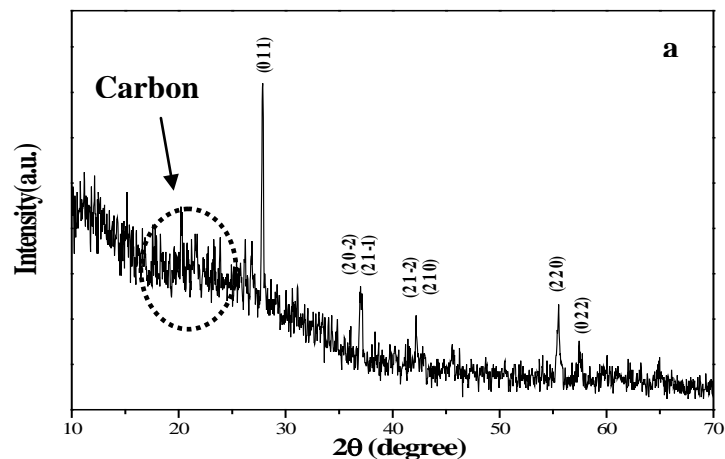

### SI 2. TGA of as synthesised VO<sub>2</sub> in air atmosphere

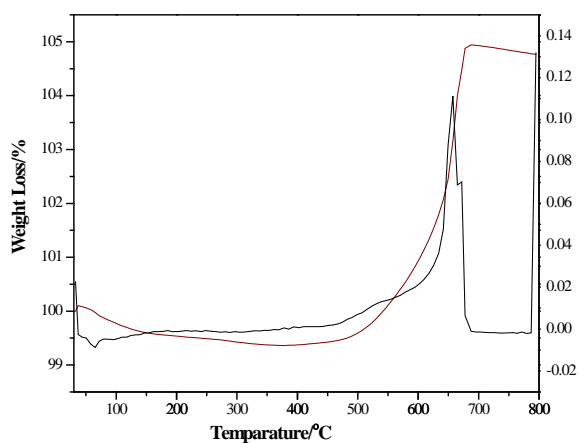

The weight loss of 0.57 % below 300 °C is attributed to both physically adsorbed water as well as the carbon content in it. As the evaporation of free water and physically adsorbed water goes below 150 °C, hence the remaining weight loss of about 0.16% is purely due to the carbon content in the as synthesised sample.
